# Supplementary material
Source: Springer Nature journal article supplement (https://www.springermedizin.de/resource/supplementary/12889_2009_1935_MOESM1_ESM.pdf/9484748)

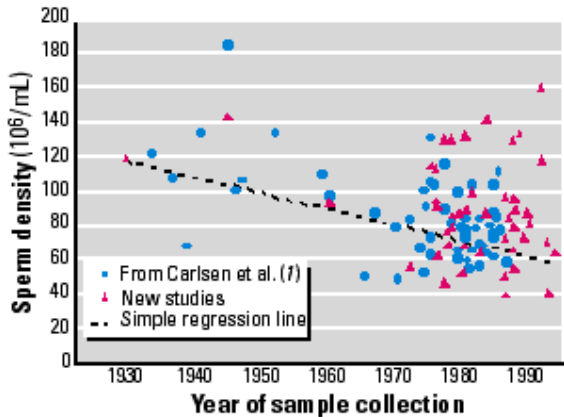

Supplement: MOESM1 [file 9484748]
